# Supplementary material
Source: publisher site journal article supplement (https://www.spandidos-publications.com/6520/downloadSupplementary)
Supplement: Supplementary file 1 [file downloadSupplementary]

## Sheet: Table S2
Table SII. 445 candidate genes.
symbol
NUSAP1
TOP2A
CLDN11
ANLN
TPX2
CKAP2
ZNF483
PAMR1
KIF11
DLGAP5
CCNA2
LDB2
CEP55
PGM5
CNN1
ASPM
DMD
NCAPG
FAM49B
KPNA2
BUB1
CENPE
KCTD5
SETBP1
MEG3
OSTC
CENPF
CDK1
CKAP2L
CENPN
KIF20A
ANKRD20A11P
NTN4
NDC80
ANG
BGN
AURKA
C20orf24
MYH11
ACTR3
DNALI1
IGFBP6
AHNAK
TSHZ2
KIF4A
GSN
KIF2C
HMMR
KIF23
TTK
PRC1
MELK
CKS2
CCNB2
MYLK
SMC4
STIL
RACGAP1
PRDX4
STC2
TXN
CENPA
KIF14
SPRY1
HJURP
CTSB
CCNB1
SHCBP1
EGFLAM
CCDC167
UBE2T
XPOT
STMN1
BLM
MTHFD2
ECT2
IL18
NDUFB3
KLF9
PGAM1
EXO1
ABRACL
ISM1
WSB2
PARP1
HIST2H4B
UBE2C
LEPR
FAM72A
MAD2L1
FEN1
GART
GSTM2
MCM10
BIRC5
ATAD2
SRPK1
HDGF
ZWINT
PBK
GRN
FAM83D
RCC2
KIF15
LACTB
CDKN3
ACTA2
CDC7
TSPAN7
GLRX3
FNDC1
PSMA6
MCM4
PCNA
MCM6
SQLE
LSM4
SLC25A5
EBF1
CDC123
POLQ
ANO1
IRS1
MSRB3
GTF3C6
PGK1
CD34
ARL4A
CDC20
STAT1
ITGAX
HTATIP2
JAM3
TRIP13
MTUS1
PLAT
PLSCR4
FOSB
RAB31
PTTG1
CDC45
NUDT5
SKA1
NFE2L3
RGS10
TYMS
UQCRHL
CCT8
CHEK1
RIPK2
MAMDC2
MTDH
FANCD2
COL1A1
COL10A1
PRICKLE2
SLC7A5
FAM184A
UQCRH
ABCA8
FHL1
NEK2
UCHL5
CDCA8
SASH1
NFAT5
CX3CR1
ACACB
HIF1A
MRPL15
CXCR4
PSME2
ADAMTS1
OIP5
DLC1
PSMA3
CIRBP
LAMB2
CD83
MASTL
COX7B
TPI1
MMP1
GOLT1B
MME
LAMA2
GBP5
CXCL9
CDCA2
SPP1
MRPL13
SLIT2
PLAUR
RSPO3
SULF1
TFB2M
DNAJA1
PDLIM3
SNAI2
OPN3
CYCS
EGR1
HPRT1
PKM
TNFRSF9
DONSON
ME2
ISG20L2
MND1
SYK
CDC25A
MGC24103
APOO
ILF2
XRCC2
SMS
AURKB
SLC50A1
USP14
CXCL11
PDE5A
CCT6A
KDELR3
KNTC1
CSE1L
XIST
CPE
TIPRL
CTPS1
CXCL12
PSME4
ICOS
TAP1
APOC1
CHAF1B
GGH
MTFR1
DCTPP1
LRRC17
LRRC15
LYPLA1
PDSS1
KIF20B
ITM2A
UCHL3
ANKRD20A4
LCP1
GZMB
BRI3BP
PLEK
SVEP1
PCDH17
SPTBN1
MFAP4
TMEM47
SAP30
CAV1
GINS2
MT1X
E2F7
SORBS1
ENC1
VCAN
PMAIP1
GNG11
WLS
CYBRD1
HSPH1
ALYREF
HSPA14
ARL5B
MPDZ
ATP1B3
GMPS
SLIT3
MCM7
COL11A1
FAP
TAF2
DDX21
SPARCL1
CFD
RASSF2
TFPI
LIN9
TPPP3
PRKDC
PGM3
E2F5
HLA-DMB
DAPP1
IDO1
CTLA4
PPARG
OLFML2B
CDO1
THY1
FRMD6
COL3A1
RAD21
LAPTM4B
PNPT1
ADH1A
COL5A2
DARS2
POSTN
MMP13
PLAU
SKP2
UAP1
FOS
P4HA1
COL4A1
SRPX
TAGLN
ECM2
PDGFRL
IMPA2
MMP3
MCOLN2
GTPBP4
PSAT1
RFC4
PDCD5
LPXN
MYL9
TXNIP
AIM2
IL17RD
CD53
DUSP6
SELL
RHOB
RHBDL2
LRRC8B
DUSP1
PRKX
CD37
IRF8
CCR7
TBC1D9
STEAP2
ANKRD22
CKS1B
CD52
GSTM3
DPT
RASD1
RASGRP1
CDCA7
LIMA1
ESM1
TMEM14A
PLIN1
OGN
CDH5
A2ML1
IL33
PDGFRA
TGFBR2
SMOC2
PCDH18
PLOD2
MAL2
DCN
PDK4
MYO10
ADAM9
TIMP3
ZFP36
GZMA
EPAS1
METTL7A
GLT8D2
UBD
CD48
CHRNA5
RGS5
OSGIN2
COMP
MBOAT2
LAD1
FMOD
COL1A2
VWF
CIDEC
INHBB
SERPING1
ESRP1
TARBP1
IRS2
SLC12A2
CXCL13
SLC2A1
ABI3BP
SGCE
CENPW
CD36
FABP4
ABCC4
MGP
GZMK
GJB2
CXCL14
PLIN4
SOX4
EFEMP1
AOX1
EVI2B
SERPINE1
GPX8
TNFAIP3
P2RY10
CD3D
CCL5
GPX3
PARM1
LEP
PPP1R3C
COL8A1
SEL1L3
TNFAIP6
SLAMF6
CYTIP
CES1
VNN2
CCL21
ENPP2
COLEC12
SEMA3E
CD2
CD38
GAPT
ME1
LOX
LYVE1
BAMBI
OMD
EPCAM
GBP4
PLCH1
LAMC2
C7
CD96
G0S2
